# Supplementary material for: Improving usability of Electronic Health Records in a UK Mental Health setting: a feasibility study
Source: PubMed Central journal article supplement (PMC9177469; doi:10.1007/s10916-022-01832-0), 2022-06-08
Supplement: 10916_2022_1832_MOESM1_ESM.pdf [file 10916_2022_1832_MOESM1_ESM.pdf]

|                                |                |
|--------------------------------|----------------|
| <b>TEST, XX TEST</b>           | Born 20/05/198 |
|                                | Gende          |
| Addr: No Fixed Abode, ZZ99 3VZ | NHS No. Uni    |

|                |                                         |              |                |               |        |
|----------------|-----------------------------------------|--------------|----------------|---------------|--------|
| GP             | <a href="#">Dr. Not Applicable</a>      | Patient ID   | 371021         |               |        |
| Consultant     |                                         | Gender       | Male           | Care Type     | No CPA |
| Primary Worker |                                         | Legal Status | No MHA Section | Assessment MH |        |
| Alert          | No Alerts recorded against this patient |              |                |               |        |

|              |             |           |  |  |
|--------------|-------------|-----------|--|--|
| Status       | Unconfirmed |           |  |  |
| Date         |             | Time      |  |  |
| Confirmed By |             | Job Title |  |  |

|                                                   |                |              |       |
|---------------------------------------------------|----------------|--------------|-------|
| Form Details <span style="float: right;">i</span> |                |              |       |
| <a href="#">Original Author*</a>                  | Daniel Maughan |              |       |
| Entered Date                                      | 07/04/2020     | Entered Time | 12:25 |
| <a href="#">Event Date*</a>                       | 07/04/2020     | Event Time*  | 12:25 |

The User Guide for the completion of this form is available on the Trust Intranet [here](#)

|                                                                                                       |                           |                                        |                                    |                                             |                                 |
|-------------------------------------------------------------------------------------------------------|---------------------------|----------------------------------------|------------------------------------|---------------------------------------------|---------------------------------|
| Service Setting                                                                                       |                           |                                        |                                    |                                             |                                 |
| See Additions information for each service, CYP: Adult: Older Adult: Learning Disabilities: Perinatal |                           |                                        |                                    |                                             |                                 |
| Service*                                                                                              | <input type="radio"/> CYP | <input checked="" type="radio"/> Adult | <input type="radio"/> Older People | <input type="radio"/> Learning Disabilities | <input type="radio"/> Perinatal |

|                                                                  |                                                                  |  |  |
|------------------------------------------------------------------|------------------------------------------------------------------|--|--|
| Generic Assessment                                               | Please check the relevant assessments before starting this form. |  |  |
| Presenting Situation including the Patients view of Difficulties | Adult/Perinatal <span style="float: right;">i</span>             |  |  |
|                                                                  |                                                                  |  |  |
| History of Presenting Complaint                                  | Adult/Perinatal <span style="float: right;">i</span>             |  |  |
|                                                                  |                                                                  |  |  |
| Medical History                                                  | Adult/Perinatal <span style="float: right;">i</span>             |  |  |
|                                                                  |                                                                  |  |  |
| Current Medication                                               | Adult/Perinatal <span style="float: right;">i</span>             |  |  |
|                                                                  |                                                                  |  |  |
| Psychiatric History                                              | Adult/Perinatal <span style="float: right;">i</span>             |  |  |
|                                                                  |                                                                  |  |  |
| Personal History                                                 | Adult/Perinatal <span style="float: right;">i</span>             |  |  |
|                                                                  |                                                                  |  |  |
| Family History                                                   | Adult/Perinatal <span style="float: right;">i</span>             |  |  |
|                                                                  |                                                                  |  |  |
| Forensic History                                                 | Adult/Perinatal <span style="float: right;">i</span>             |  |  |
|                                                                  |                                                                  |  |  |

|                                                    |                                                                                                                                                                                                                                |
|----------------------------------------------------|--------------------------------------------------------------------------------------------------------------------------------------------------------------------------------------------------------------------------------|
|                                                    |                                                                                                                                                                                                                                |
| Social Circumstances                               | Adult/Perinatal <a href="#">i</a>                                                                                                                                                                                              |
| Alcohol and Drug Usage                             | Adult/Perinatal <a href="#">i</a>                                                                                                                                                                                              |
| Spiritual/Cultural Needs                           | Adult/Perinatal <a href="#">i</a>                                                                                                                                                                                              |
| Is the Patient a Carer, Parent or being cared for? | Adult/Perinatal <a href="#">i</a>                                                                                                                                                                                              |
| Pre-Morbid Personality                             | Adult/Perinatal <a href="#">i</a>                                                                                                                                                                                              |
| Safeguarding Status*                               | Adult/Perinatal <a href="#">i</a> <a href="#">Adult policy</a><br><input type="radio"/> There is Safeguarding Involvement <input type="radio"/> Safeguarding concerns <input type="radio"/> No safeguarding concerns or issues |
| Does the Patient have any dependents?              | Adult/Perinatal <a href="#">i</a><br><input type="radio"/> Yes <input type="radio"/> No <input checked="" type="radio"/> Not Assessed                                                                                          |
| Capacity at time of Assessment                     | Adult/Perinatal <a href="#">i</a>                                                                                                                                                                                              |

|                          |  |
|--------------------------|--|
| Mental State Examination |  |
| Appearance               |  |
| Behaviour                |  |
| Speech                   |  |
| Mood                     |  |
| Thoughts                 |  |
| Perception               |  |
| Cognition                |  |
| Insight                  |  |

[i](#) For further guidance on the statutory duties of the Care Act [here](#)

|                                                                         |                                                                                                                                                                                                         |
|-------------------------------------------------------------------------|---------------------------------------------------------------------------------------------------------------------------------------------------------------------------------------------------------|
| Care Act Compliance                                                     | To ascertain if this person has a significant long term unmet social care need affecting their wellbeing, which will be addressed by their mental health treatment please complete the questions below. |
| Is the person having problems with managing and maintaining nutrition?* | <input type="radio"/> Yes <input type="radio"/> No <input type="radio"/> Not Known <input checked="" type="radio"/> Not Assessed                                                                        |
|                                                                         | <input type="radio"/> Yes <input type="radio"/> No <input type="radio"/> Not Known <input checked="" type="radio"/> Not Assessed                                                                        |

|                                                                                                                                                                            |                                                                                                                                                                                                                                                  |
|----------------------------------------------------------------------------------------------------------------------------------------------------------------------------|--------------------------------------------------------------------------------------------------------------------------------------------------------------------------------------------------------------------------------------------------|
| Is the person having problems maintaining personal hygiene?*                                                                                                               |                                                                                                                                                                                                                                                  |
| Is the person having problems managing toilet needs?*                                                                                                                      | <input type="radio"/> Yes <input type="radio"/> No <input type="radio"/> Not Known <input checked="" type="radio"/> Not Assessed                                                                                                                 |
| Is the person having problems being appropriately clothed?*                                                                                                                | <input type="radio"/> Yes <input type="radio"/> No <input type="radio"/> Not Known <input checked="" type="radio"/> Not Assessed                                                                                                                 |
| Is the person having problems being able to make use of the adults home safely?*                                                                                           | <input type="radio"/> Yes <input type="radio"/> No <input type="radio"/> Not Known <input checked="" type="radio"/> Not Assessed                                                                                                                 |
| Is the person having problems maintaining a habitable home environment?*                                                                                                   | <input type="radio"/> Yes <input type="radio"/> No <input type="radio"/> Not Known <input checked="" type="radio"/> Not Assessed                                                                                                                 |
| Is the person having problems developing and maintaining family or other personal relationships?*                                                                          | <input type="radio"/> Yes <input type="radio"/> No <input type="radio"/> Not Known <input checked="" type="radio"/> Not Assessed                                                                                                                 |
| Is the person having problems accessing and engaging in work, training, education or volunteering?*                                                                        | <input type="radio"/> Yes <input type="radio"/> No <input type="radio"/> Not Known <input checked="" type="radio"/> Not Assessed                                                                                                                 |
| Is the person having problems making use of necessary facilities or services in the local community, including public transport, and recreational facilities or services?* | <input type="radio"/> Yes <input type="radio"/> No <input type="radio"/> Not Known <input checked="" type="radio"/> Not Assessed                                                                                                                 |
| Is the person having problems carrying out any caring responsibilities the adult has for a child?*                                                                         | <input type="radio"/> Yes <input type="radio"/> No <input type="radio"/> Not Known <input checked="" type="radio"/> Not Assessed                                                                                                                 |
| <b>Psychological Therapies</b>                                                                                                                                             |                                                                                                                                                                                                                                                  |
| Is a referral to Psychological Therapies needed?*                                                                                                                          | <input type="radio"/> Yes <input type="radio"/> No <input type="radio"/> Not asked <input checked="" type="radio"/> Not Assessed                                                                                                                 |
| <b>Third Party information</b>                                                                                                                                             |                                                                                                                                                                                                                                                  |
| Consider carer, parent, relative, any other involved in patient's care. Include any specific requests to who should/should not receive information.                        |                                                                                                                                                                                                                                                  |
| <b>Actions</b>                                                                                                                                                             |                                                                                                                                                                                                                                                  |
| Medication Changes*                                                                                                                                                        | <input type="radio"/> Yes <input type="radio"/> No <input type="radio"/> Not Known <input checked="" type="radio"/> Not Applicable                                                                                                               |
| Actions for GP*                                                                                                                                                            | <input type="radio"/> Yes <input type="radio"/> No <input type="radio"/> Not Known <input checked="" type="radio"/> Not Applicable                                                                                                               |
| Follow up clinical review required?*                                                                                                                                       | <input type="radio"/> Yes <input type="radio"/> No <input type="radio"/> Not Known <input checked="" type="radio"/> Not Applicable <b>Ensure you record the next clinical using the diary appoi form</b>                                         |
| Additional Plans*                                                                                                                                                          | <b>Adult/Perinatal</b> <br><input type="radio"/> Yes <input type="radio"/> No <input type="radio"/> Not Known <input checked="" type="radio"/> Not Applicable |
| <b>Research and Consent</b>                                                                                                                                                |                                                                                                                                                                                                                                                  |
| Has the Patient consented to be contacted by Research?*                                                                                                                    | <input type="radio"/> Yes <input type="radio"/> No <input type="radio"/> Not Asked                                                                                                                                                               |
| Does the Patient want a copy of the Assessment letter?*                                                                                                                    | <input type="radio"/> Yes <input type="radio"/> No <input type="radio"/> Not Asked                                                                                                                                                               |
| Is there anyone else that should receive a copy?*                                                                                                                          | <input type="radio"/> Yes <input type="radio"/> No <input type="radio"/> Not Asked                                                                                                                                                               |

**Information Governance message to all users of patient information**

The Data Protection Act and GDPR means that patients have important and extensive rights around what the Trust does with their data. By accessing you are processing data on behalf of the Trust and you have personal legal responsibilities [Click here](#). Use of patient records must comply with Trust Information Governance Policy ([Click here](#)), Standard Operating Procedures ([Click here](#)), access the IG Tab) and Data Protection Act 2018 ([Click here](#))

**Respect information and privacy.**
