# Supplementary material for: Improving usability of Electronic Health Records in a UK Mental Health setting: a feasibility study
Source: PubMed Central journal article supplement (PMC9177469; doi:10.1007/s10916-022-01832-0), 2022-06-08
Supplement: 10916_2022_1832_MOESM2_ESM.pdf [file 10916_2022_1832_MOESM2_ESM.pdf]

**TEST, XX (Mr)** Born 14/11/2018 (16i)  
Gende  
 Addr: No Fixed Abode, ZZ99 3VZ NHS No. Uni

|                |                                         |              |                    |               |        |
|----------------|-----------------------------------------|--------------|--------------------|---------------|--------|
| GP             | <a href="#">Dr. Unknown</a>             | Patient ID   | 352982             |               |        |
| Consultant     |                                         | Gender       | Male               | Care Type     | No CPA |
| Primary Worker |                                         | Legal Status | No MHA Section     | Assessment MH |        |
|                |                                         | School       | No school recorded |               |        |
| Alert          | No Alerts recorded against this patient |              |                    |               |        |

|              |  |             |  |  |  |
|--------------|--|-------------|--|--|--|
| Status       |  | Unconfirmed |  |  |  |
| Date         |  | Time        |  |  |  |
| Confirmed By |  | Job Title   |  |  |  |

|                  |                |                                                                                   |       |  |  |
|------------------|----------------|-----------------------------------------------------------------------------------|-------|--|--|
| Form Details     |                |  |       |  |  |
| Original Author* | Daniel Maughan |                                                                                   |       |  |  |
| Entered Date     | 07/04/2020     | Entered Time                                                                      | 12:23 |  |  |
| Event Date*      | 07/04/2020     | Event Time*                                                                       | 12:23 |  |  |

The User Guide for the completion of this form is available on the Trust Intranet [here](#)

|                                                                                                       |                                                                                                                                                                                 |
|-------------------------------------------------------------------------------------------------------|---------------------------------------------------------------------------------------------------------------------------------------------------------------------------------|
| Service Setting                                                                                       |                                                                                                                                                                                 |
| See Additions information for each service, CYP: Adult: Older Adult: Learning Disabilities: Perinatal |                                                                                                                                                                                 |
| Service*                                                                                              | <input checked="" type="radio"/> CYP <input type="radio"/> Adult <input type="radio"/> Older People <input type="radio"/> Learning Disabilities <input type="radio"/> Perinatal |

|                                                                  |                                                                                         |
|------------------------------------------------------------------|-----------------------------------------------------------------------------------------|
| Generic Assessment                                               | Please check the relevant assessments before starting this form.                        |
| Presenting Situation including the Patients view of Difficulties | CYP    |
|                                                                  |                                                                                         |
| History of Presenting Complaint                                  | CYP  |
|                                                                  |                                                                                         |
| Medical History                                                  | CYP  |
|                                                                  |                                                                                         |
| Current Medication                                               | CYP  |
|                                                                  |                                                                                         |
| Psychiatric History                                              | CYP  |
|                                                                  |                                                                                         |
| Personal History                                                 | CYP  |
|                                                                  |                                                                                         |
| Family History                                                   | CYP  |
|                                                                  |                                                                                         |
| Forensic History                                                 | CYP  |
|                                                                  |                                                                                         |

|                                                    |                                                                                                                                                                                                         |
|----------------------------------------------------|---------------------------------------------------------------------------------------------------------------------------------------------------------------------------------------------------------|
|                                                    |                                                                                                                                                                                                         |
| Social Circumstances                               | CYP ⓘ                                                                                                                                                                                                   |
| Alcohol and Drug Usage                             | CYP ⓘ                                                                                                                                                                                                   |
| Spiritual/Cultural Needs                           | CYP ⓘ                                                                                                                                                                                                   |
| Is the Patient a Carer, Parent or being cared for? | CYP ⓘ                                                                                                                                                                                                   |
| Pre-Morbid Personality                             | CYP ⓘ                                                                                                                                                                                                   |
| Safeguarding Status*                               | CYP ⓘ <a href="#">Children's policy</a><br><input type="radio"/> There is Safeguarding Involvement <input type="radio"/> Safeguarding concerns <input type="radio"/> No safeguarding concerns or issues |
| Does the Patient have any dependents?              | CYP ⓘ<br><input type="radio"/> Yes <input type="radio"/> No <input checked="" type="radio"/> Not Assessed                                                                                               |
| Capacity at time of Assessment                     | CYP ⓘ                                                                                                                                                                                                   |
| Mental State Examination                           |                                                                                                                                                                                                         |
| Appearance                                         |                                                                                                                                                                                                         |
| Behaviour                                          |                                                                                                                                                                                                         |
| Speech                                             |                                                                                                                                                                                                         |
| Mood                                               |                                                                                                                                                                                                         |
| Thoughts                                           |                                                                                                                                                                                                         |
| Perception                                         |                                                                                                                                                                                                         |
| Cognition                                          |                                                                                                                                                                                                         |
| Insight                                            |                                                                                                                                                                                                         |
| Additional Information                             |                                                                                                                                                                                                         |
|                                                    | ⓘ                                                                                                                                                                                                       |
| Eating behaviours                                  |                                                                                                                                                                                                         |

|                                                                                                                                                     |                                                                                                                                                                                                          |
|-----------------------------------------------------------------------------------------------------------------------------------------------------|----------------------------------------------------------------------------------------------------------------------------------------------------------------------------------------------------------|
|                                                                                                                                                     |                                                                                                                                                                                                          |
| <b>i</b>                                                                                                                                            |                                                                                                                                                                                                          |
| <b>School</b>                                                                                                                                       |                                                                                                                                                                                                          |
| <b>i</b>                                                                                                                                            |                                                                                                                                                                                                          |
| <b>Engagement</b>                                                                                                                                   |                                                                                                                                                                                                          |
| <b>i</b>                                                                                                                                            |                                                                                                                                                                                                          |
| <b>Developmental History</b>                                                                                                                        |                                                                                                                                                                                                          |
| <b>i</b>                                                                                                                                            |                                                                                                                                                                                                          |
| <b>Observation of Behaviour</b>                                                                                                                     |                                                                                                                                                                                                          |
| <b>i</b>                                                                                                                                            |                                                                                                                                                                                                          |
| Third Party Information                                                                                                                             |                                                                                                                                                                                                          |
| Consider carer, parent, relative, any other involved in patient's care. Include any specific requests to who should/should not receive information. |                                                                                                                                                                                                          |
| Actions                                                                                                                                             |                                                                                                                                                                                                          |
| <b>Medication Changes*</b>                                                                                                                          | <input type="radio"/> Yes <input type="radio"/> No <input type="radio"/> Not Known <input checked="" type="radio"/> Not Applicable                                                                       |
| <b>Actions for GP*</b>                                                                                                                              | <input type="radio"/> Yes <input type="radio"/> No <input type="radio"/> Not Known <input checked="" type="radio"/> Not Applicable                                                                       |
| <b>Follow up clinical review required?*</b>                                                                                                         | <input type="radio"/> Yes <input type="radio"/> No <input type="radio"/> Not Known <input checked="" type="radio"/> Not Applicable <b>Ensure you record the next clinical using the diary appoi form</b> |
| <b>CYP</b> <b>i</b>                                                                                                                                 |                                                                                                                                                                                                          |
| <b>Additional Plans*</b>                                                                                                                            | <input type="radio"/> Yes <input type="radio"/> No <input type="radio"/> Not Known <input checked="" type="radio"/> Not Applicable                                                                       |
| Research and Consent                                                                                                                                |                                                                                                                                                                                                          |
| <b>Has the Patient consented to be contacted by Research?*</b>                                                                                      | <input type="radio"/> Yes <input type="radio"/> No <input type="radio"/> Not Asked                                                                                                                       |
| <b>Does the Patient want a copy of the Assessment letter?*</b>                                                                                      | <input type="radio"/> Yes <input type="radio"/> No <input type="radio"/> Not Asked                                                                                                                       |
| <b>Is there anyone else that should receive a copy?*</b>                                                                                            | <input type="radio"/> Yes <input type="radio"/> No <input type="radio"/> Not Asked                                                                                                                       |

**Information Governance message to all users of patient information**

The Data Protection Act and GDPR means that patients have important and extensive rights around what the Trust does with their data. By accessing you are processing data on behalf of the Trust and you have personal legal responsibilities [Click here](#). Use of patient records must comply with Trust Information Governance Policy ([Click here](#)), Standard Operating Procedures ([Click here](#)), access the IG Tab) and Data Protection Act 2018 ([Click here](#))

**Respect information and privacy.**
